# Supplementary material for: Coordination-bond-assisted fabrication of robust composite photonic crystal films through melt-compression
Source: Royal Society of Chemistry journal article supplement (doi:10.1039/d4qm00566j), 2024-01-01
Supplement: d4qm00566j1.pdf [file d4qm00566j1.pdf]

## Supporting Information

### Coordination-bond assisted fabrication of robust composite photonic crystal films through melt-compression

Jiahao Li<sup>a</sup>, Tongling Yu<sup>a</sup>, Chengcai Wu<sup>a</sup>, Qianyao Fang<sup>a</sup> and Xin Su<sup>\*a</sup>

*School of Material Science and Chemical Engineering, Ningbo University, Ningbo, Zhejiang, 315211, China.*

**Table S1.** Recipes for preparing monodisperse PS spheres with various diameters

| SDS solution (mL) | Diameter (nm) |
|-------------------|---------------|
| 2.6               | 175           |
| 2.2               | 205           |
| 1.8               | 220           |
| 1.2               | 250           |

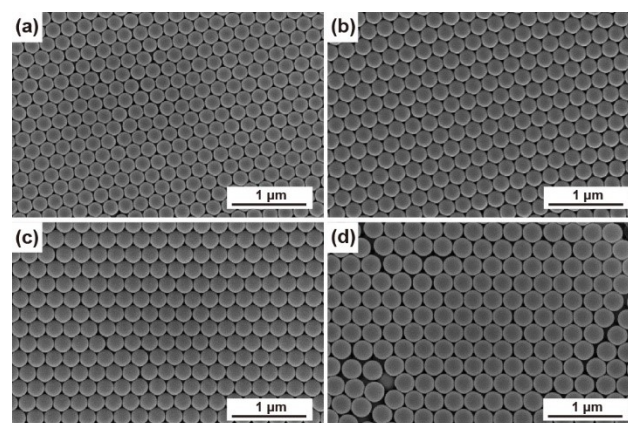

**Figure S1.** SEM images of monodisperse PS cores with different diameters: (a) 175 nm; (b) 205 nm; (c) 220 nm; (d) 250 nm

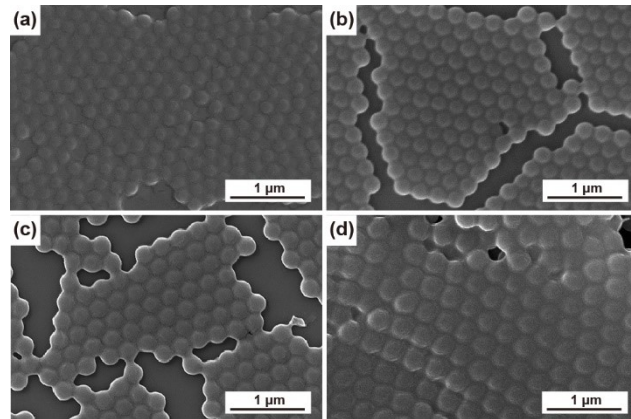

**Figure S2.** SEM images of monodisperse PS@PEA-PAA core-shell spheres with different diameters: (a) 225 nm; (b) 265 nm; (c) 280 nm; (d) 310 nm. The diameter of PS cores for core-shell spheres are 175 nm, 205 nm, 220 nm and 250 nm, respectively.

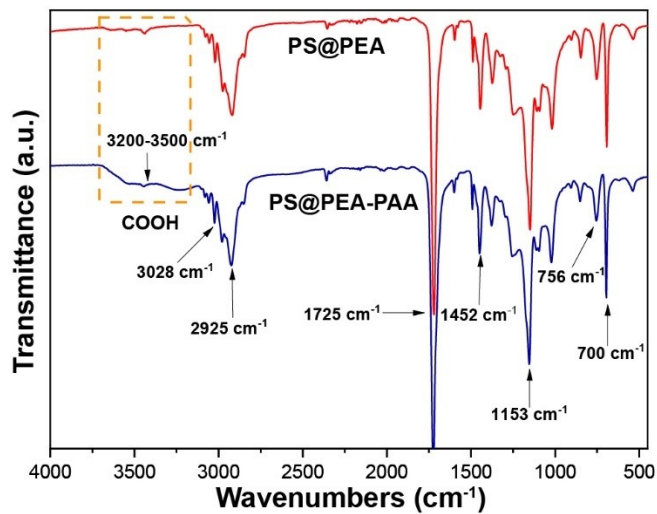

**Figure S3.** FTIR spectra of PS@PEA and PS@PEA-PAA spheres

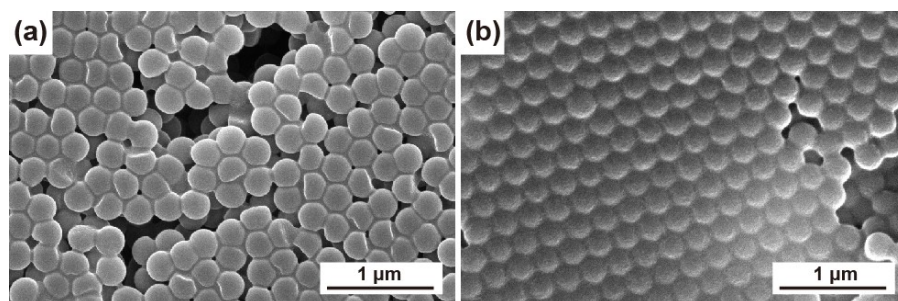

**Figure S4.** SEM images of core-shell polymer spheres with different PS cores: (a) uncross-linked PS cores; (b) cross-linked PS cores

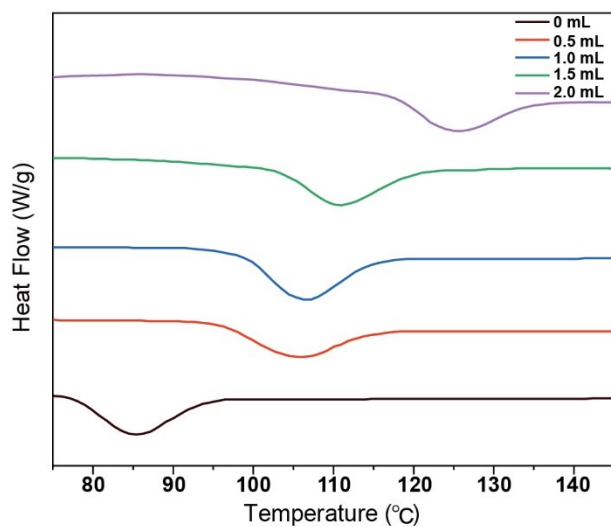

**Figure S5.** Effect of different BDDA dosage on the glass transition temperatures of PS cores

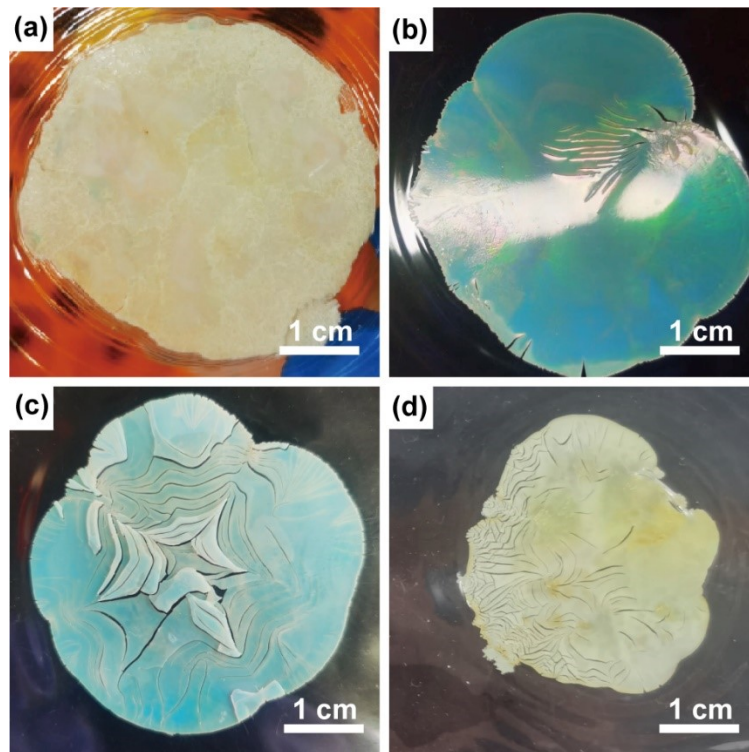

**Figure S6.** Digital photographs of composite films prepared by adding different metal salts: (a)  $\text{AlCl}_3$ ; (b)  $\text{CaCl}_2$ ; (c)  $\text{CsCl}$ ; (d)  $\text{CeCl}_3$

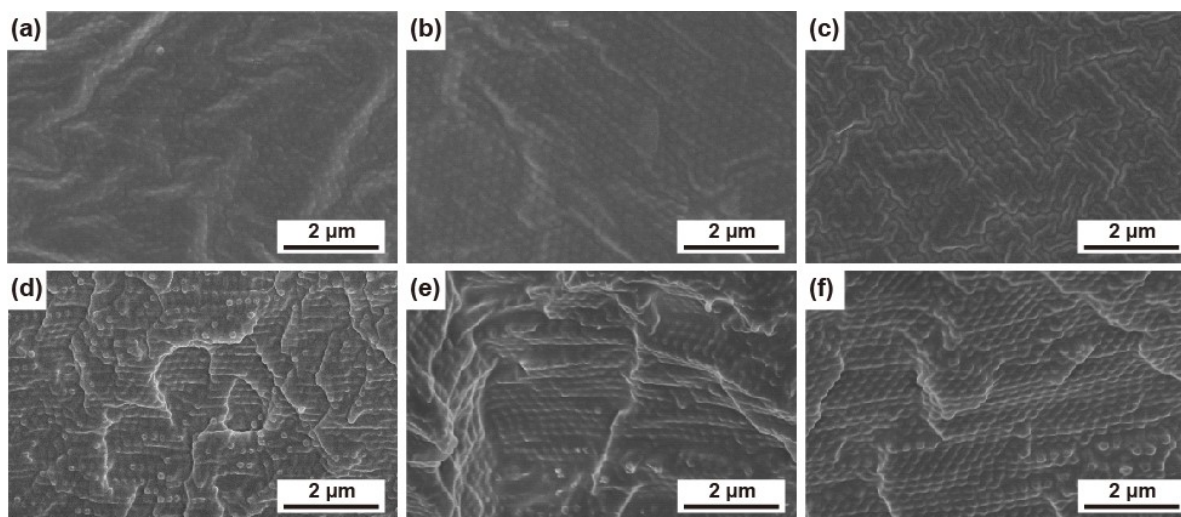

**Figure S7.** (a-c) SEM images of PC films fabricated using 225 nm, 265 nm and 310 nm PS@PEA-PAA CS spheres as building blocks with 1 mmol  $\text{ZnCl}_2$  added into the precursor, respectively.; (d-f) are cross-sectional SEM images of (a-c), respectively.

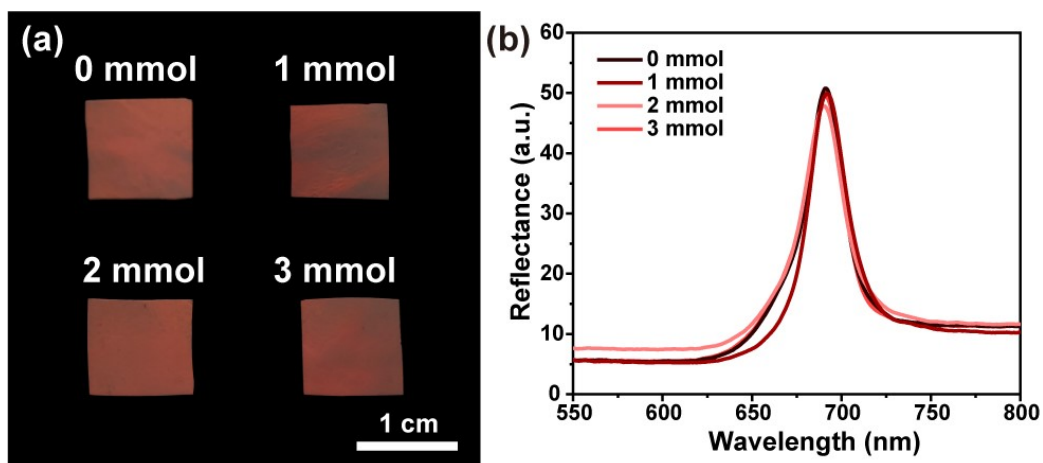

**Figure S8.** (a) Digital photographs of PC films fabricated with 310 nm PS@PEA-PAA CS spheres as building blocks and various amount of ZnCl<sub>2</sub> added into the precursor; (b) reflectance spectra of corresponding PCs in (a)

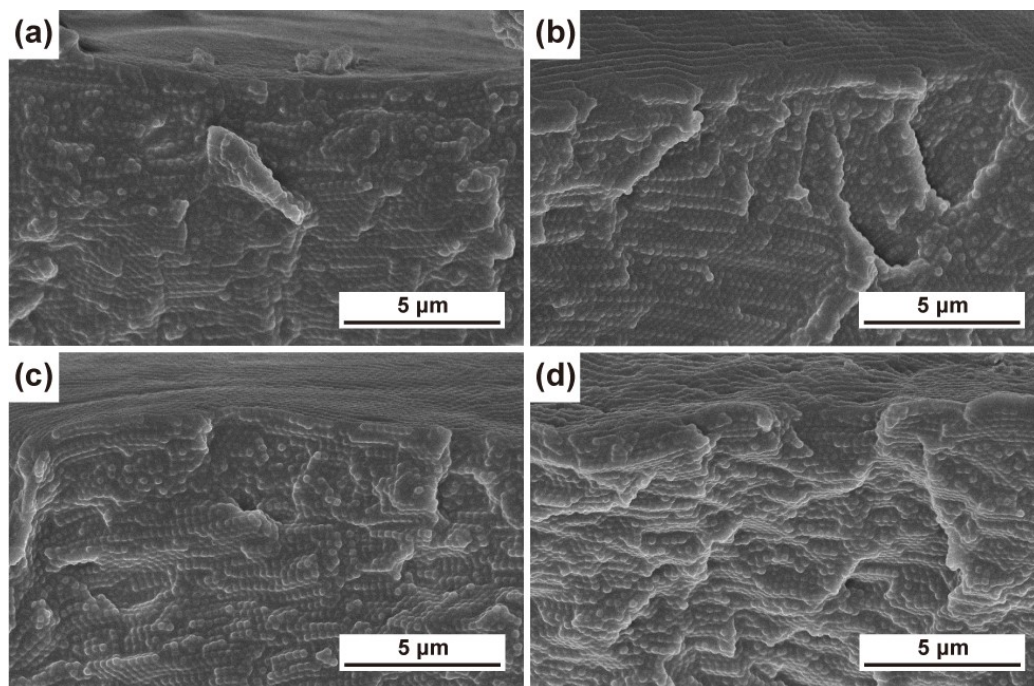

**Figure S9.** SEM images of PC films fabricated with 310 nm PS@PEA-PAA CS spheres as building blocks and various amount of ZnCl<sub>2</sub> added into the precursor: (a) 0 mmol; (b) 1 mmol; (c) 2 mmol; (d) 3 mmol



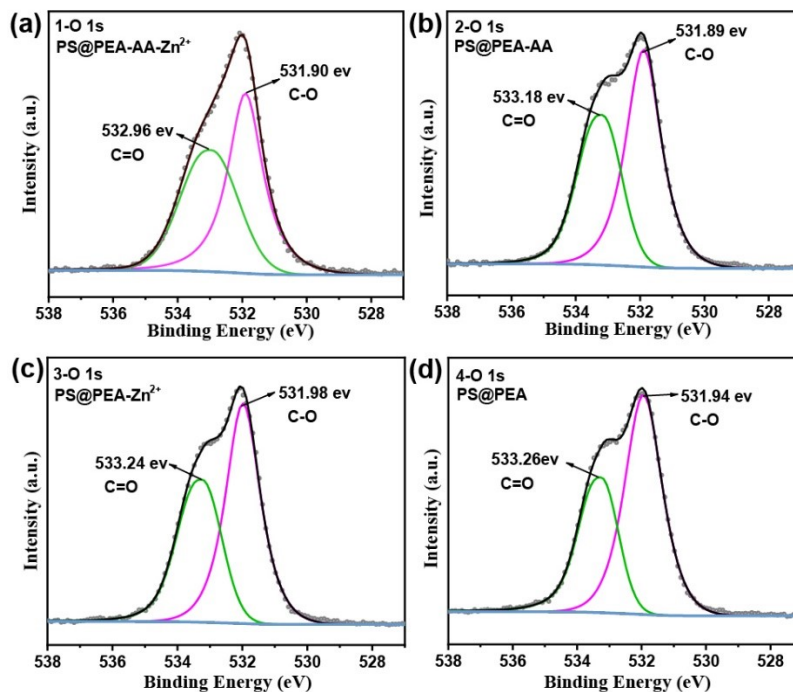

**Figure S10.** XPS spectra of PC films from various precursors: (a) PS@PEA-PAA and  $Zn^{2+}$  composite; (b) PS@PEA-PAA spheres; (c) PS@PEA and  $Zn^{2+}$  composite; (d) PS@PEA spheres

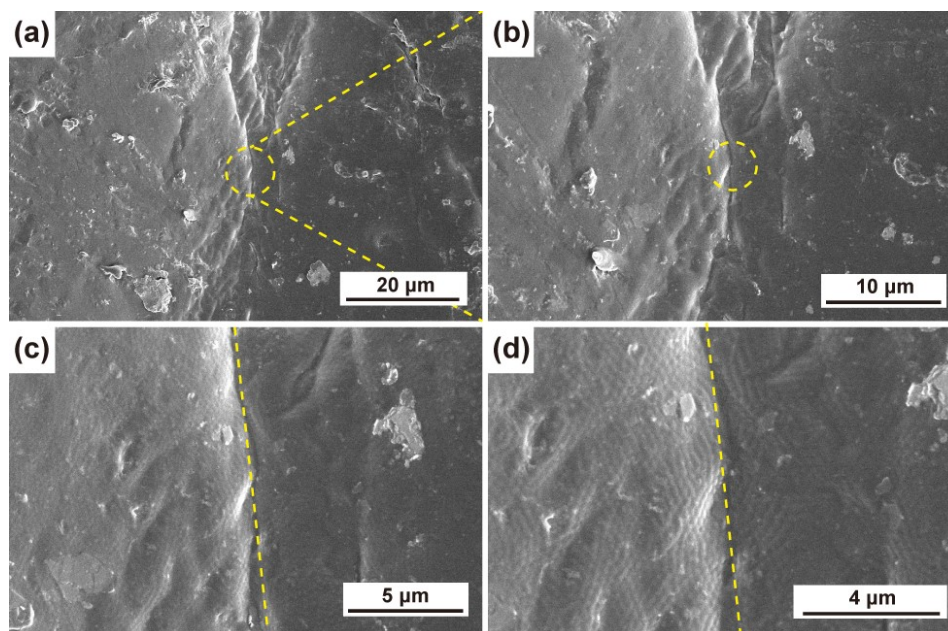

**Figure S11.** SEM images of the combined section of a composite PC film from red and blue PC films with various magnification times

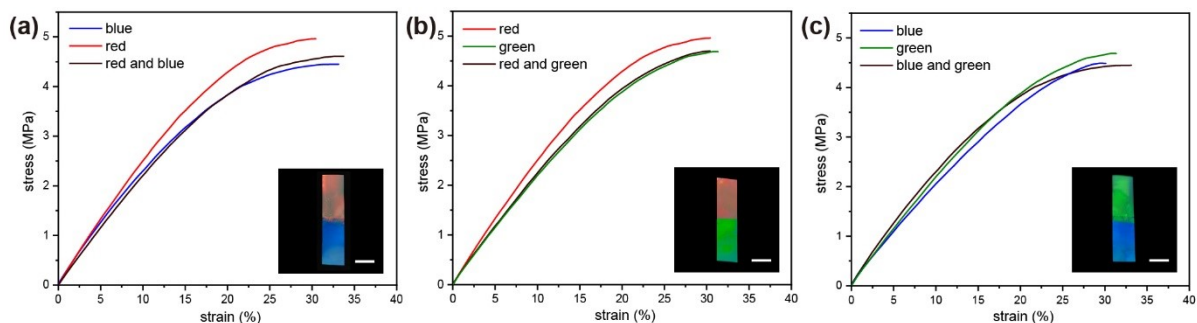

**Figure S12.** Strain-stress curves of three combined composite PC films with their component films with single colors as references: (a) red and blue film; (b) red and green film; (c) blue and green film. The insets are digital photographs of corresponding combined composite PC films with the scale bar being 1 cm.

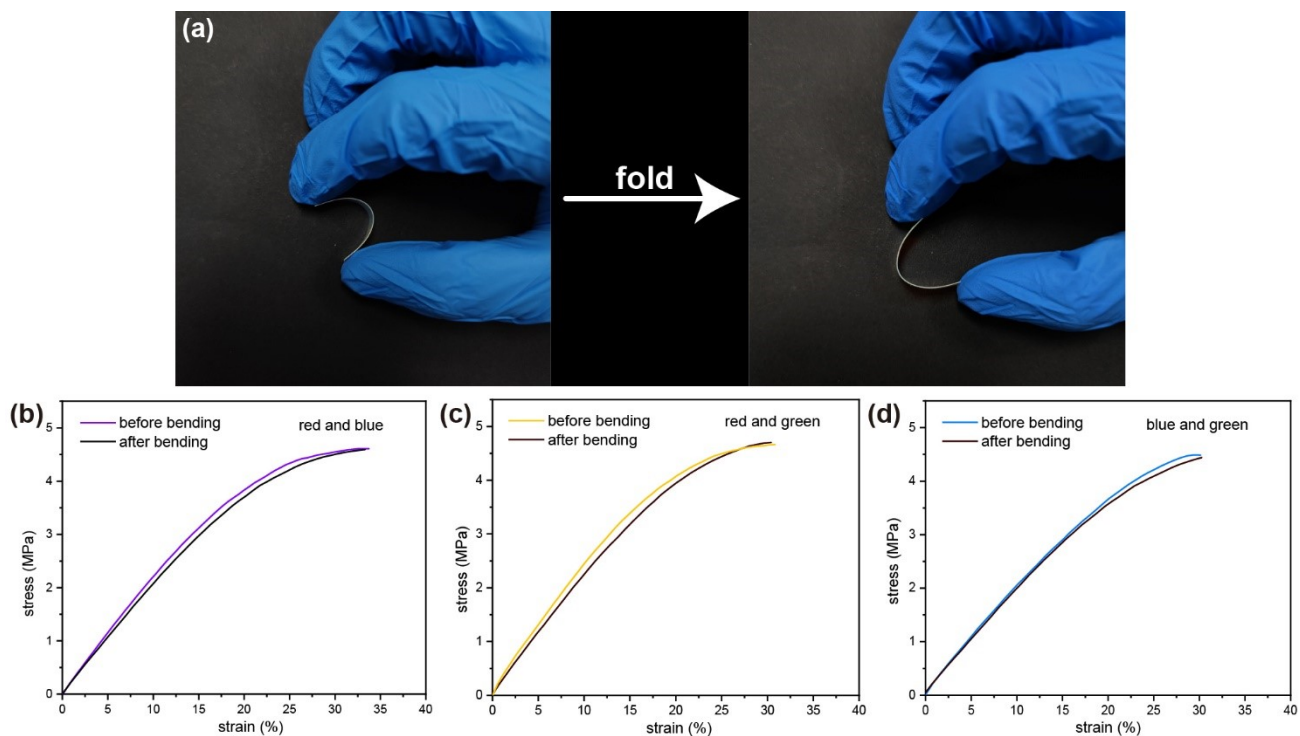

**Figure S13.** (a) Digital photographs demonstrating bending operations; Strain-stress curves of combined composite PC films before and after bending for 100 times: (b) red and blue films; (c) red and green films; (d) blue and green films

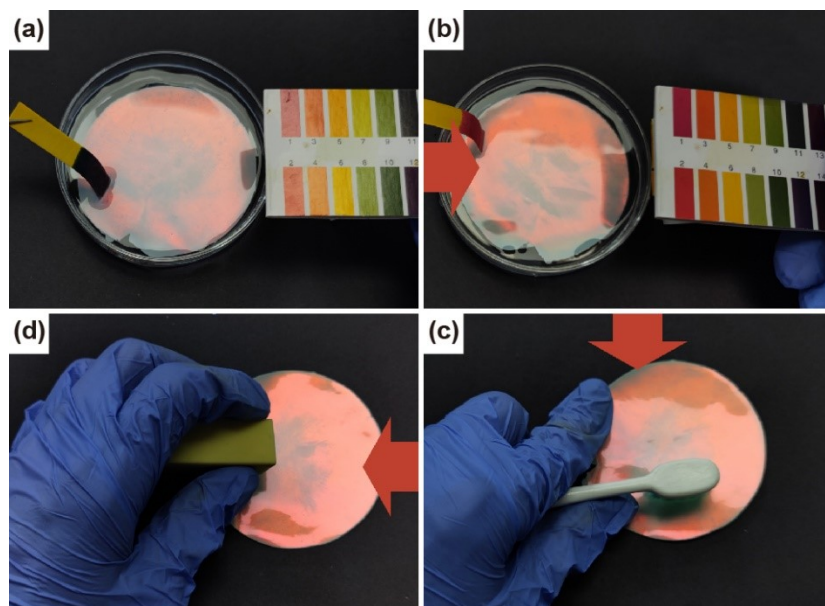

**Figure S14.** Digital photographs of a red composite PC film (a,b) soaked in basic solution (pH=12) and acid solution (pH=2) for 2 h; (c) brushed and (d) rubbed for 100 times
